# Supplementary material for: Genome-wide association study reveals a GLYCOGEN SYNTHASE KINASE 3 gene regulating plant height in Brassica napus
Source: Front Plant Sci. 2022 Nov 2;13:1061196. doi: 10.3389/fpls.2022.1061196 (PMC9666772; doi:10.3389/fpls.2022.1061196)
Supplement: Supplementary file 4 [file DataSheet_1.xlsx]

## Sheet: Supplementary Table 1
Supplementary Table 1. Overview of whole-genome resequencing data
Accessions ID	Accessions Name	Ecotype	Country	All Depth (×)	All Cov (%)	All Base	All Cov Base	All Read
#001	Yangguang198	SW	China	6.88	80.94	5076438906	597605394	34331785
#003	1033019	SW	China	5.97	80.58	4409666169	594997097	29670909
#004	699	SW	China	6.73	82.51	4972006845	609224471	33602500
#005	Zhongshuang11-1	SW	China	7.82	83.62	5770705034	617420336	39007804
#006	Huahang901	SW	China	7.12	83	5254664023	612852280	35499725
#007	FC03	SW	China	7.01	84.13	5173618124	621176587	34966881
#011	Zheyou28	SW	China	6.81	84	5027680815	620248385	34109471
#012	Yangguang2009	SW	China	7.96	83.76	5878267465	618466928	39767038
#013	Huyou21	SW	China	7.48	84.99	5523925070	627527027	37378104
#015	Hongyou3号	SW	China	8.16	83.29	6021952115	614968854	40702789
#016	Yangjian8	SW	China	7.92	83.24	5850838084	614613501	39530937
#017	P6036-1	SW	China	6.79	83.74	5014909498	618289133	33906776
#018	Xiwang106	SW	China	5.78	82.75	4265086424	610995432	28844957
#019	Zheyou18	SW	China	6.47	81.94	4777413657	604990592	32299060
#020	P4009	SW	China	6.14	81.58	4531474148	602337260	30645627
#021	68232	SW	China	6.25	81.31	4618114710	600350892	31228308
#022	N5424	SW	China	6.21	81.41	4586362461	601087292	31011394
#024	Zhongshuang1	SW	China	7	82.62	5169653903	610002471	34960036
#025	Huyou17	SW	China	6.71	83.54	4954486362	616792639	33525747
#026	Zhongshuang9	SW	China	5.46	82.26	4032398436	607355003	27301407
#029	Zheyou5002	SW	China	6.21	82.04	4585669746	605757585	31043248
#030	40853	SW	China	7.06	83.25	5213031172	614644243	35282151
#032	Zhongnongyou136	SW	China	6.54	83.49	4827641344	616440915	32686272
#033	Zheyou17	SW	China	7.41	83.83	5469328917	618954377	36991238
#034	24729	SW	China	7.16	83.62	5286139301	617394506	35801049
#035	Shengguang77	SW	China	6.06	83.14	4470712051	613828249	30250255
#036	Zheyou19	SW	China	7.07	83.6	5219940400	617252267	35313437
#037	Zhongshuang4	SW	China	6.8	82.99	5022907916	612745878	33979505
#039	Zhongshuang6	SW	China	6.6	79.2	4874723848	584803766	32974846
#040	Zhongshuang7	SW	China	6.5	84.05	4802524321	620557731	32499082
#042	Zhongshuang9-1	SW	China	5.29	81.99	3902333103	605386275	26415082
#043	Zhongshuang10	SW	China	6.28	81.81	4633924689	604070156	31327796
#044	Huyou19	SW	China	6.1	82.78	4501767941	611236393	30424777
#045	Huashuang4	SW	China	6.52	84.39	4817271197	623103233	32508853
#046	Huashuang5	SW	China	5.56	82.26	4107573118	607355790	27726512
#047	Fuyou668	SW	China	6.03	82.94	4450800760	612350426	30145839
#048	You88	SW	China	6	80.92	4428120717	597482735	29993483
#049	Nannongyou1	SW	China	7	84.74	5167409974	625696766	35002443
#050	Nannongyou2	SW	China	7.07	83.01	5216867642	612919445	35300056
#051	Nannongyou3	SW	China	6.13	83.6	4523561326	617224967	30534139
#053	Huaiyou18	SW	China	6.97	84.11	5149032673	621056703	34755959
#054	Ningyou20	SW	China	7.82	84.27	5773029712	622219786	38962916
#055	91806-9	SW	China	6.81	84.87	5028854020	626623179	33976157
#056	9630	SW	China	6.66	83.15	4917365607	613970994	33200617
#057	96E01×6529-2	SW	China	7.05	83.28	5207702762	614870657	35143644
#058	Zhongshuang4-2	SW	China	7.51	83.75	5542923028	618403091	37405094
#060	Riyou3②×Hu840049	SW	China	6.53	82.91	4819311118	612187812	32624001
#061	20043	SW	China	5.89	82.32	4351698066	607842970	29301260
#062	21933	SW	China	5.66	81.21	4181369525	599643948	28300210
#063	30852	SW	China	6.62	82.46	4885607406	608866991	33048176
#064	9548×9630	SW	China	6.89	82.64	5090113126	610189706	34407516
#065	91806×889	SW	China	6.86	82.71	5065451170	610675820	34296819
#067	04BD650	SW	China	6.3	82.65	4653051821	610258640	31492755
#068	082×888-3	SW	China	6.09	82.37	4495210919	608166748	30248739
#070	D083×888-5	SW	China	7.77	83.01	5739296341	612898112	38628979
#071	J113	SW	China	7.35	83.62	5428399688	617430215	36744366
#072	228-1×YD12	SW	China	6.59	82.52	4866231846	609256350	32720346
#073	6529-02-01	SW	China	7.11	82.97	5246249359	612608001	35499049
#074	888	SW	China	5.88	80.13	4339800498	591609209	29221497
#076	855	SW	China	6.95	84.21	5133580201	621767631	34753406
#077	888 458	SW	China	7.94	84.85	5859003610	626503275	39613607
#078	897 274 QH412	SW	China	7.19	79.74	5309782573	588747917	35909484
#079	G142	SW	China	6.79	82.86	5013227636	611760415	33714579
#082	7186 TYT2	SW	China	5.32	79.04	3924964350	583582681	26542679
#085	D083	W	Germany	6.65	84.41	4907671701	623255249	33164489
#086	M083	W	Germany	7.37	83.17	5443927187	614107136	36860911
#087	Chuanyou96II-19	SW	China	6.6	81.16	4870380301	599263196	32774761
#089	94005	SW	China	6.48	79.95	4787319164	590293251	32374628
#090	ChuanyouIII-20	SW	China	7.08	82.43	5230637840	608597805	35380264
#091	Gumengkuyoucai(1)	SW	China	8.42	84.31	6218098749	622487499	42045513
#093	96CY007	SW	China	7.03	82.42	5190916615	608518531	35142938
#094	Shengliqinggeng	SW	China	7.16	82.41	5287383060	608485569	35780277
#097	Huyou4	SW	China	5.58	78.45	4116660008	579197655	27708183
#100	Dahuaqiu	SW	China	4.65	78.81	3433920470	581892888	23145017
#101	Shanyou110	SW	China	5.77	80.22	4260188113	592316049	28877853
#102	424	SW	China	5.99	76.87	4423132173	567573603	29935288
#104	Xiangyou2	SW	China	5.61	79.41	4143025391	586329891	27936468
#105	71-39	SW	China	5.33	78.25	3935368271	577763202	26522126
#107	Xiuyou1	SW	China	6	80.83	4427183004	596803875	29778880
#108	Chuannongchangjiao	SW	China	5.58	80.41	4121458079	593678830	27755508
#117	Hujizao	SW	China	4.96	81.82	3661166459	604080635	24667447
#119	Zheyou7	SW	China	6.97	83.01	5148624961	612916041	34821889
#120	82773	SW	China	5.4	79.87	3985726679	589718135	26848126
#121	Ninyou7	SW	China	5.13	81.2	3785070423	599521908	25518604
#122	Fengding240	SW	China	5.72	80.55	4225134219	594710002	28473468
#123	Yang2008	SW	China	5.75	79.5	4249036185	587001750	28626518
#124	Yangyou1	SW	China	5.43	81.45	4008318897	601379308	27027269
#125	Fengyou1	SW	China	7.53	82.15	5562527680	606568094	37661091
#126	BF10	SW	China	7.04	83.12	5199195842	613697421	35301649
#128	790215	SW	China	6.46	82.61	4766062290	609969973	32232552
#129	3209	SW	China	6.56	82.77	4841751487	611137166	32729154
#130	410	SW	China	6.2	82.49	4577431094	609090442	30973758
#131	202-23	SW	China	6.65	81.78	4911042077	603835415	33231231
#132	Dangyouzao1	SW	China	7.56	80.49	5584223679	594280682	37786621
#133	Tonglinghuaye	SW	China	7.08	83.51	5228010958	616610189	35401262
#134	Huaye1	SW	China	7.05	83.25	5202217501	614657038	35209437
#135	Qinyou3	SW	China	7.05	84.02	5207432521	620324018	35193915
#137	Xinyang7833	SW	China	5.81	83.69	4291782767	617924407	29080855
#138	Ganyou5	SW	China	6.6	83.22	4871312526	614417904	32964769
#140	Yixuan159	SW	China	5.89	81.49	4346690474	601663870	29400023
#141	318-6（一）	SW	China	5.9	83.67	4356038719	617788185	29464011
#142	Yuyiganlan	SW	China	6.36	82.04	4696330100	605769198	31769280
#144	6013-3	SW	China	6.99	82.95	5158733270	612445305	34952117
#145	6020-1	SW	China	5.32	81.9	3928919353	604732097	26591748
#146	6019-3	SW	China	7.01	83.2	5176059762	614280775	35003939
#152	85-13	SW	China	7.01	84.86	5178832367	626535189	35091360
#153	EH3145	SW	China	5.93	80.28	4380669314	592720394	29658186
#154	EH3143	SW	China	5.92	77.75	4373003682	574076604	29621576
#155	23002	SW	China	6.34	82.43	4679724965	608602807	31715497
#158	Zaofeng50	SW	China	6.05	81.44	4470450646	601279348	30236774
#162	Chen'erzi	SW	China	7.29	82.06	5384969838	605877945	36418559
#164	Yueyang8565	SW	China	6.13	82.14	4526685842	606496496	30640752
#165	78015	SW	China	7.44	82.89	5496980862	611993746	37203240
#166	78036	SW	China	5.09	80.88	3755872837	597179070	25304527
#168	TB313	SW	China	5.73	80.9	4233831329	597300841	28667576
#169	Xiangnongyou3	SW	China	7.2	82.24	5317382811	607195634	36018935
#170	75-1	SW	China	5.81	81.09	4287409337	598730614	29047313
#173	730004	SW	China	6.44	82.41	4751868820	608473546	32190246
#176	57-43	SW	China	7.32	81.37	5405986567	600784078	36615413
#177	Yunyou9	SW	China	7.05	82.63	5202654382	610083261	35181180
#178	76-004	SW	China	6.48	82.33	4782336987	607916428	32374776
#183	Fuyou3	SW	China	6.63	83.28	4894217642	614912091	33087757
#184	97Xuan	SW	China	7.21	81.99	5323373190	605378989	36008564
#186	E097037	SW	China	6.53	79.19	4819164025	584706705	32618461
#187	Longyoutuzhong	SW	China	6.49	83.8	4792078356	618728315	32408706
#191	971014	SW	China	6.3	86.37	4650951943	637744640	31339473
#192	971038	SW	China	7.99	83.15	5900326134	613930152	39914108
#193	Huangzi6	SW	China	7.41	84.8	5473606824	626106468	37025553
#198	GLOBAL	S	Australia	6.83	83.54	5039446180	616809461	34103981
#204	HJa98942	S	Finland	7.15	83.98	5277364436	620091483	35695099
#205	Dong-Hae23	SW	Japan	6.17	81.35	4552402471	600651540	30822043
#209	RV3	S	Australia	6.78	81.93	5009401037	604936788	33929553
#210	BLN247	S	Australia	6.28	81.77	4639298091	603732657	31372579
#212	Wesbrook	S	Australia	5.99	80.99	4419982371	598016485	29883560
#214	Ujfertadi	W	Hungary	6.14	81.83	4535904684	604226823	30676042
#215	NPZ 3/84	W	Germany	7.25	84.8	5350300450	626120525	36148704
#216	NPZ 51	W	Germany	6.57	83.59	4848034735	617158020	32763863
#218	H47	W	Russia	7.48	88.43	5523733769	652893428	37346425
#220	Tripol	W	Poland	5.46	82.56	4031025125	609565068	27250926
#223	Helanheiyoucai	W	Poland	6.52	81.49	4810421721	601666426	32384304
#224	H56	W	United_Kingdom	8.12	85.49	5997014145	631209811	40552162
#225	Mochowski	W	France	5.16	79.39	3809558881	586206294	25617688
#226	Mochowski	W	France	6.48	81.57	4786606038	602303448	32409074
#228	Drake	W	France	7.24	83.29	5343160917	614971606	36145769
#235	SV.Topas	S	Sweden	6.63	82.67	4897226286	610391961	33183444
#236	SV.Tyko	W	Sweden	9.31	83.16	6875952380	613986529	46501384
#240	79-186	S	America	6.43	81.11	4751269727	598885741	32167827
#241	Crimsonking	S	New Zealand	7.27	81.68	5370917529	603119788	36342110
#242	Doon Sportan lot 616	S	New Zealand	6.15	77.85	4541990569	574831068	30771203
#244	Puma-SV.8627102	W	Sweden	7.07	84.1	5217064562	620923926	35297458
#245	Fquom	W	Unknown	7.66	86.54	5653795474	638940756	38156412
#246	Nonglin32	SW	Japan	6.82	83.17	5033048285	614072516	34071589
#248	31208	SW	India	6.85	83.2	5060007348	614316668	34224034
#250	MARNOO-2	S	Canada	6.88	80.88	5083304059	597159464	34454709
#251	Buk wuku	SW	Korea	6.6	81.78	4871243907	603845493	32991440
#253	CRESOR	S	France	6.65	83.05	4909056898	613224057	33254850
#254	ESTTS	S	Sweden	5.97	84.34	4410254259	622689804	29870985
#255	Bounty	S	Sweden	5.66	82.53	4179159422	609327807	28298111
#256	Jackpot	S	Sweden	6.09	81.77	4497203704	603772962	30429218
#257	Trojan	S	Sweden	5.54	82.53	4090556946	609332908	27716790
#258	Vanguard	S	Sweden	4.83	78.29	3567415004	578025702	24175805
#259	Ceres	W	Sweden	5.3	83.1	3912109678	613558622	26496893
#260	delta	S	Sweden	5.18	78.97	3823196041	583110331	25892020
#261	ReainaII	W	Unknown	7.22	82.32	5334373769	607774063	36132993
#263	IUPITER	W	Unknown	6.48	80.49	4786948915	594320858	32441568
#264	Nonglin32	SW	Japan	6.69	83.72	4937726740	618117533	33451392
#265	Nonglin13	SW	Japan	6.14	81.41	4532855751	601100813	30742818
#266	Nonglin41	SW	Japan	6.34	82.65	4684222617	610261410	31726714
#268	669 3C779	SW	China	6.34	81.75	4682741635	603571440	31712074
#270	889 QH456	SW	China	5.18	82.26	3826267679	607344967	25935285
#271	Zhongyou821	SW	China	4.61	79.37	3402665576	586026284	23049903
#272	897 274 QH412	SW	China	6.54	81.59	4827423846	602434711	32612605
#274	944	SW	China	6.47	82.52	4779383640	609299742	32274399
#276	EMS-1	SW	China	5.08	78.84	3752468991	582138533	25277857
#277	EMS-2	SW	China	7.69	81.47	5675076049	601505483	38176521
#278	EMS-6	SW	China	6.13	81.6	4525086839	602467843	30647138
#280	EMS-10	SW	China	6.63	82.53	4894898837	609337458	33151851
#282	EMS-15	SW	China	4.46	79.28	3292367789	585384900	22252400
#283	EMS-16	SW	China	4.8	80.26	3543782664	592615926	23954289
#285	EMS-21	SW	China	5.3	81.79	3916683933	603907405	26484211
#286	EMS-25	SW	China	6.32	81.69	4667166544	603133004	31396740
#287	EMS-28	SW	China	5.45	81.93	4022204137	604955795	27187941
#288	EMS-30	SW	China	4.73	80.05	3489821667	591072193	23592626
#289	EMS-33	SW	China	4.78	81.53	3527228597	601951292	23834976
#291	EMS-37	SW	China	7.06	82.28	5209721068	607487150	35205307
#292	EMS-41	SW	China	6.6	84.49	4872320184	623826595	32930600
#293	EMS-42	SW	China	6.77	82.52	4996675219	609320387	33766533
#294	EMS-43	SW	China	4.84	80.82	3572220538	596740619	24146381
#295	EMS-44	SW	China	4.52	79.66	3337099661	588203273	22570644
#301	EMS-53	SW	China	5.38	80.04	3970841475	591006263	26721011
#302	EMS-54	SW	China	5.3	78.89	3911175630	582460780	26311049
#303	EMS-61	SW	China	5.96	80.72	4397636939	595976101	29599636
#305	EMS-68	SW	China	6.27	82.14	4628183478	606458301	31295742
#306	EMS-70	SW	China	6.73	85.86	4967090223	633982654	33451862
#308	EMS-74	SW	China	6.15	80.29	4538849717	592799687	30740673
#309	EMS-75	SW	China	6.41	82.55	4730772068	609480466	32006199
#310	EMS-76	SW	China	6.32	82.14	4663784557	606478692	31535524
#312	EMS-80	SW	China	5.37	80.88	3965576139	597150453	26685066
#313	EMS-81	SW	China	5.86	81.72	4323234091	603382755	29107260
#314	EMS-83	SW	China	5.26	80.43	3884430809	593874314	26145196
#315	EMS-84	SW	China	6.6	81.12	4871950575	598940246	32775920
#316	EMS-86	SW	China	4.92	78.84	3629797357	582128072	24429025
#318	EMS-90	SW	China	6.9	80.83	5096574259	596776523	34453723
#320	EMS-92	SW	China	7.13	82.62	5264744106	610050282	35550990
#321	EMS-93	SW	China	6.24	80.93	4604045670	597525644	31156042
#322	Xiangyou15	SW	China	6.48	81.46	4785328044	601467919	32194894
#323	Shengli52	SW	China	6.52	83.18	4816177012	614163784	32410632
#349	MOANA RAPE	W	New Zealand	6.79	82.07	5011469098	605996405	33722976
#350	Escort	W	France	6.95	82.78	5128596083	611168832	34451478
#351	Jantar	W	Poland	6.28	78.85	4638953174	582194515	31237443
#352	Licapo	W	Germany	7.95	83.66	5873080015	617668003	39457032
#353	Binera	W	Norway	7.23	86.26	5341139750	636895641	35885553
#354	Express 617	W	Germany	8.19	85.55	6049253656	631659949	40633745
#355	Rivette	S	Australia	5.65	79.26	4174756975	585247060	28116264
#357	FORA	W	Sweden	6.96	82.63	5142364563	610131594	34573263
#358	Bolko	W	Poland	5.72	82.41	4225689288	608508892	28429629
#359	Mohican	W	United_Kingdom	6.84	83.24	5053291562	614609692	33937022
#360	Picasso	W	United_Kingdom	8.18	84.64	6040764679	624923586	40568989
#361	Verona	W	unknown	5.55	80.87	4095080847	597124943	27546908
#363	BRAUNER SCHNITTKOHL	W	Siberian	5.7	80.69	4206899205	595802332	28303010
#364	Zenith	W	unknown	5.75	80.41	4246187509	593728146	28554493
#365	Bladkool	W	Netherlands	8.32	82.54	6146301614	609416081	41308122
#366	Sobotkowski	W	Poland	6.63	83.8	4892963329	618714354	32856695
#371	Tanka	S	Canada	5.85	80.27	4322439421	592679414	29103405
#373	INDUSTRY	S	Denmark	7.8	82.99	5755828603	612767370	38731794
#377	Vega	S	Denmark	6.85	82.43	5055819995	608619816	34041018
#378	Triton	S	Canada	6.14	81.15	4532765372	599164295	30546008
#380	Rucabo	S	Germany	6.49	82.14	4790464349	606499784	32218735
#381	Sophia	S	unknown	6.64	83.12	4899539847	613714381	32961990
#383	Bronowski	S	Poland	6.21	82.74	4588574601	610892699	30890676

## Sheet: Supplementary Table 2
Supplementary Table 2. Lists of GSK3s genes identification in Brassicaceae.
Group	Gene name	At	Bn.A	Bn.C	Br.A	Bo.C
Group I	SK11	AT5G26751	BnaA06g28290D	BnaC07g28590D	BraA06g034800.3.5C	BolC07g040140.2J
			BnaA09g04100D	BnaC09g03480D	BraA09g005550.3.5C	BolC09g005790.2J
	SK12	AT3G05840	BnaA03g29180D	BnaC03g34380D	BraA03g032760.3.5C	BolC03g037920.2J
			BnaA05g31460D	BnaC05g46010D	BraA05g040660.3.5C	BolC05g059810.2J
			BnaAnng02930D		BraA01g043560.3.5C	BolC01g054680.2J
	SK13	AT5G14640	BnaA03g05700D	BnaC03g06580D		BolC03g007210.2J
Group II	BIN2	AT4G18710	BnaA01g09530D	BnaC01g11150D	BraA01g010300.3.5C	BolC01g012440.2J
			BnaAnng31110D	BnaC03g62810D	BraA03g049100.3.5C	BolC03g075790.2J
			BnaAnng35300D	BnaC07g50210D	BraA08g013660.3.5C	BolC07g047990.2J
	BIL1	AT2G30980	BnaA05g11700D	BnaC04g41660D	BraA05g013850.3.5C	BolC04g057230.2J
				BnaCnng52760D
	BIL2	AT1G06390	-	-	-	-
Group III	SK31	AT3G61160	BnaA07g18960D	BnaCnng13510D	BraA07g025350.3.5C	BolC06g026070.2J
			BnaA09g38810D		BraA09g052560.3.5C	BolC08g044250.2J
	SK32	AT4G00720	BnaA03g27010D	BnaC03g31970D	BraA03g030460.3.5C	BolC03g035320.2J
			BnaA09g51790D	BnaCnng02170D	BraA09g000430.3.5C	BolC09g000500.2J
	SK41	AT1G09840	BnaA06g05770D	BnaC05g07320D	BraA06g006820.3.5C	BolC05g007640.2J
Group IV			BnaA08g26100D	BnaCnng48480D	BraA08g033010.3.5C	BolC08g021460.2J
	SK42	AT1G57870	-	-	-	-
At, gene ID of AtGSK3s in Arabidopsis; Bn.A, gene ID of BnGSK3s in B. napus A sub-genome; Bn.C, gene ID of BnGSK3s in B. napus C sub-genome; Br.A, gene ID of BrGSK3s in B. rapa; Bo.C, gene ID of BoGSK3s in B. oleracea.

## Sheet: Supplementary Table 3
Supplementary Table 3. The list of significant SNPs associated with plant height
Chromosome	Position	P value	Environment	Model
A01	1574050	4.18911e-06	2017-2018	BLINK
A01	4772232	1.28172e-21	2017-2018	BLINK
A01	15014216	3.25548e-06	2017-2018	BLINK
A01	17803877	8.69529e-06	2017-2018	BLINK
A01	4684723	3.25931e-08	2017-2018	MLM
A01	4687224	3.68385e-08	2017-2018	MLM
A01	4684117	6.06938e-08	2017-2018	MLM
A01	4686798	7.16718e-08	2017-2018	MLM
A01	4686807	7.16718e-08	2017-2018	MLM
A01	4686810	7.16718e-08	2017-2018	MLM
A01	4686078	7.67045e-08	2017-2018	MLM
A01	4649191	8.27357e-08	2017-2018	MLM
A01	4685096	8.47544e-08	2017-2018	MLM
A01	4687541	8.47544e-08	2017-2018	MLM
A01	4686795	8.66791e-08	2017-2018	MLM
A01	4686828	8.66791e-08	2017-2018	MLM
A01	4686834	8.66791e-08	2017-2018	MLM
A01	4683163	9.07074e-08	2017-2018	MLM
A01	4683208	9.07074e-08	2017-2018	MLM
A01	4685706	9.07074e-08	2017-2018	MLM
A01	4685713	9.07074e-08	2017-2018	MLM
A01	4686094	9.07074e-08	2017-2018	MLM
A01	4686095	9.07074e-08	2017-2018	MLM
A01	4686159	9.07074e-08	2017-2018	MLM
A01	4686447	9.07074e-08	2017-2018	MLM
A01	4686456	9.07074e-08	2017-2018	MLM
A01	4686555	9.07074e-08	2017-2018	MLM
A01	4686585	9.07074e-08	2017-2018	MLM
A01	4686588	9.07074e-08	2017-2018	MLM
A01	4683795	9.89073e-08	2017-2018	MLM
A01	4683304	1.02555e-07	2017-2018	MLM
A01	4684919	1.0895e-07	2017-2018	MLM
A01	4648059	1.10798e-07	2017-2018	MLM
A01	4648067	1.10798e-07	2017-2018	MLM
A01	4648080	1.10798e-07	2017-2018	MLM
A01	4687116	1.13751e-07	2017-2018	MLM
A01	4649051	1.19034e-07	2017-2018	MLM
A01	4649063	1.19034e-07	2017-2018	MLM
A01	4649132	1.19034e-07	2017-2018	MLM
A01	4682903	1.19034e-07	2017-2018	MLM
A01	4687495	1.19034e-07	2017-2018	MLM
A01	4687263	1.21083e-07	2017-2018	MLM
A01	4686726	1.40235e-07	2017-2018	MLM
A01	4686843	1.44787e-07	2017-2018	MLM
A01	4652161	1.51876e-07	2017-2018	MLM
A01	4648075	1.71191e-07	2017-2018	MLM
A01	4648032	1.77489e-07	2017-2018	MLM
A01	4648036	1.77489e-07	2017-2018	MLM
A01	4640691	1.87688e-07	2017-2018	MLM
A01	4679293	1.87688e-07	2017-2018	MLM
A01	4679602	1.87688e-07	2017-2018	MLM
A01	4679928	1.87688e-07	2017-2018	MLM
A01	4680159	1.87688e-07	2017-2018	MLM
A01	4680166	1.87688e-07	2017-2018	MLM
A01	4681255	1.87688e-07	2017-2018	MLM
A01	4681587	1.87688e-07	2017-2018	MLM
A01	4681692	1.87688e-07	2017-2018	MLM
A01	4681729	1.87688e-07	2017-2018	MLM
A01	4681730	1.87688e-07	2017-2018	MLM
A01	4682100	1.87688e-07	2017-2018	MLM
A01	4682111	1.87688e-07	2017-2018	MLM
A01	4682116	1.87688e-07	2017-2018	MLM
A01	4683394	1.87688e-07	2017-2018	MLM
A01	4684205	1.87688e-07	2017-2018	MLM
A01	4608859	2.04611e-07	2017-2018	MLM
A01	4683260	2.06812e-07	2017-2018	MLM
A01	4686756	2.27237e-07	2017-2018	MLM
A01	4671376	3.16005e-07	2017-2018	MLM
A01	4672398	3.30839e-07	2017-2018	MLM
A01	4672596	3.30839e-07	2017-2018	MLM
A01	4672820	3.46081e-07	2017-2018	MLM
A01	4659623	3.53433e-07	2017-2018	MLM
A01	4687419	6.44164e-07	2017-2018	MLM
A01	4687426	6.44164e-07	2017-2018	MLM
A01	4687432	6.44164e-07	2017-2018	MLM
A01	4648561	9.00414e-07	2017-2018	MLM
A01	4648581	9.00414e-07	2017-2018	MLM
A01	4648583	9.00414e-07	2017-2018	MLM
A01	4648595	9.00414e-07	2017-2018	MLM
A01	4687032	9.45967e-07	2017-2018	MLM
A01	4687051	9.45967e-07	2017-2018	MLM
A01	4674002	1.00702e-06	2017-2018	MLM
A01	4648314	1.2922e-06	2017-2018	MLM
A01	4616074	1.3403e-06	2017-2018	MLM
A01	4648184	1.38522e-06	2017-2018	MLM
A01	4669375	1.43795e-06	2017-2018	MLM
A01	4648139	1.54942e-06	2017-2018	MLM
A01	4650700	1.54942e-06	2017-2018	MLM
A01	4640750	1.56113e-06	2017-2018	MLM
A01	4645802	1.56113e-06	2017-2018	MLM
A01	4648348	1.56113e-06	2017-2018	MLM
A01	4648353	1.56113e-06	2017-2018	MLM
A01	4648428	1.56113e-06	2017-2018	MLM
A01	4654321	1.56113e-06	2017-2018	MLM
A01	4673441	1.7548e-06	2017-2018	MLM
A01	4648111	1.94967e-06	2017-2018	MLM
A01	4646242	2.09831e-06	2017-2018	MLM
A01	4646266	2.09831e-06	2017-2018	MLM
A01	4646606	2.09831e-06	2017-2018	MLM
A01	4640904	2.22396e-06	2017-2018	MLM
A01	4644734	2.22396e-06	2017-2018	MLM
A01	4646230	2.22396e-06	2017-2018	MLM
A01	4655885	2.22396e-06	2017-2018	MLM
A01	4656066	2.22396e-06	2017-2018	MLM
A01	4656068	2.22396e-06	2017-2018	MLM
A01	4656155	2.22396e-06	2017-2018	MLM
A01	4658953	2.22396e-06	2017-2018	MLM
A01	4670138	2.22396e-06	2017-2018	MLM
A01	4678305	2.22396e-06	2017-2018	MLM
A01	4678834	2.22396e-06	2017-2018	MLM
A01	4647918	2.23002e-06	2017-2018	MLM
A01	4676139	2.31146e-06	2017-2018	MLM
A01	4649692	2.5341e-06	2017-2018	MLM
A01	4650790	3.04027e-06	2017-2018	MLM
A01	4651114	3.12943e-06	2017-2018	MLM
A01	4651116	3.12943e-06	2017-2018	MLM
A01	4609242	3.35896e-06	2017-2018	MLM
A01	4626652	3.53132e-06	2017-2018	MLM
A01	4668804	3.53132e-06	2017-2018	MLM
A01	4670906	3.53132e-06	2017-2018	MLM
A01	4684702	3.65022e-06	2017-2018	MLM
A01	4684705	3.65022e-06	2017-2018	MLM
A01	4684730	3.65022e-06	2017-2018	MLM
A01	4684734	3.65022e-06	2017-2018	MLM
A01	4671306	3.76299e-06	2017-2018	MLM
A01	4616136	3.99096e-06	2017-2018	MLM
A01	4609033	3.99694e-06	2017-2018	MLM
A01	4670911	4.20358e-06	2017-2018	MLM
A01	6333956	4.24583e-06	2017-2018	MLM
A01	4654693	4.29768e-06	2017-2018	MLM
A01	4645812	4.79062e-06	2017-2018	MLM
A01	4649616	4.84171e-06	2017-2018	MLM
A08	9941565	5.30629e-06	2017-2018	MLM
A08	9941595	5.30629e-06	2017-2018	MLM
A01	4615998	5.36281e-06	2017-2018	MLM
A01	4616226	5.36281e-06	2017-2018	MLM
A01	4657268	5.69821e-06	2017-2018	MLM
A01	4600143	6.14114e-06	2017-2018	MLM
A01	4616497	6.16769e-06	2017-2018	MLM
A01	8764191	6.49033e-06	2017-2018	MLM
A01	4657095	7.09205e-06	2017-2018	MLM
A01	4656978	7.15146e-06	2017-2018	MLM
A01	4682346	7.91561e-06	2017-2018	MLM
A01	4685550	8.56591e-06	2017-2018	MLM
A01	4685556	8.56591e-06	2017-2018	MLM
A01	4673174	9.07035e-06	2017-2018	MLM
A01	4673843	9.07035e-06	2017-2018	MLM
A01	4674050	9.07035e-06	2017-2018	MLM
A03	13047656	9.0836e-06	2017-2018	MLM
A01	4685119	9.08712e-06	2017-2018	MLM
A01	4682624	9.34717e-06	2017-2018	MLM
A01	4682676	9.34717e-06	2017-2018	MLM
A01	4684537	9.34717e-06	2017-2018	MLM
A01	4685166	9.34717e-06	2017-2018	MLM
A01	4685199	9.34717e-06	2017-2018	MLM
A01	4640904	1.131e-08	2017-2018	GLM
A01	4644734	1.131e-08	2017-2018	GLM
A01	4646230	1.131e-08	2017-2018	GLM
A01	4655885	1.131e-08	2017-2018	GLM
A01	4656066	1.131e-08	2017-2018	GLM
A01	4656068	1.131e-08	2017-2018	GLM
A01	4656155	1.131e-08	2017-2018	GLM
A01	4658953	1.131e-08	2017-2018	GLM
A01	4670138	1.131e-08	2017-2018	GLM
A01	4678305	1.131e-08	2017-2018	GLM
A01	4678834	1.131e-08	2017-2018	GLM
A01	4616074	2.4475e-08	2017-2018	GLM
A01	4626652	2.6119e-08	2017-2018	GLM
A01	4668804	2.6119e-08	2017-2018	GLM
A01	4670906	2.6119e-08	2017-2018	GLM
A01	4683163	2.8587e-08	2017-2018	GLM
A01	4683208	2.8587e-08	2017-2018	GLM
A01	4685706	2.8587e-08	2017-2018	GLM
A01	4685713	2.8587e-08	2017-2018	GLM
A01	4686094	2.8587e-08	2017-2018	GLM
A01	4686095	2.8587e-08	2017-2018	GLM
A01	4686159	2.8587e-08	2017-2018	GLM
A01	4686447	2.8587e-08	2017-2018	GLM
A01	4686456	2.8587e-08	2017-2018	GLM
A01	4686555	2.8587e-08	2017-2018	GLM
A01	4686585	2.8587e-08	2017-2018	GLM
A01	4686588	2.8587e-08	2017-2018	GLM
A01	4640691	6.0462e-08	2017-2018	GLM
A01	4679293	6.0462e-08	2017-2018	GLM
A01	4679602	6.0462e-08	2017-2018	GLM
A01	4679928	6.0462e-08	2017-2018	GLM
A01	4680159	6.0462e-08	2017-2018	GLM
A01	4680166	6.0462e-08	2017-2018	GLM
A01	4681255	6.0462e-08	2017-2018	GLM
A01	4681587	6.0462e-08	2017-2018	GLM
A01	4681692	6.0462e-08	2017-2018	GLM
A01	4681729	6.0462e-08	2017-2018	GLM
A01	4681730	6.0462e-08	2017-2018	GLM
A01	4682100	6.0462e-08	2017-2018	GLM
A01	4682111	6.0462e-08	2017-2018	GLM
A01	4682116	6.0462e-08	2017-2018	GLM
A01	4683394	6.0462e-08	2017-2018	GLM
A01	4684205	6.0462e-08	2017-2018	GLM
A01	4640750	6.1502e-08	2017-2018	GLM
A01	4645802	6.1502e-08	2017-2018	GLM
A01	4648348	6.1502e-08	2017-2018	GLM
A01	4648353	6.1502e-08	2017-2018	GLM
A01	4648428	6.1502e-08	2017-2018	GLM
A01	4654321	6.1502e-08	2017-2018	GLM
A01	4684723	8.8003e-08	2017-2018	GLM
A01	4669375	1.0891e-07	2017-2018	GLM
A01	4687224	1.1286e-07	2017-2018	GLM
A01	4687263	1.3029e-07	2017-2018	GLM
A01	4672398	1.4416e-07	2017-2018	GLM
A01	4672596	1.4416e-07	2017-2018	GLM
A01	4674486	1.4546e-07	2017-2018	GLM
A01	4674500	1.4546e-07	2017-2018	GLM
A01	4674505	1.4546e-07	2017-2018	GLM
A01	4674516	1.4546e-07	2017-2018	GLM
A01	4683795	1.4563e-07	2017-2018	GLM
A01	4686798	1.5889e-07	2017-2018	GLM
A01	4686807	1.5889e-07	2017-2018	GLM
A01	4686810	1.5889e-07	2017-2018	GLM
A01	4649191	1.5933e-07	2017-2018	GLM
A01	4684117	1.8137e-07	2017-2018	GLM
A01	4687116	1.835e-07	2017-2018	GLM
A01	4686795	1.8821e-07	2017-2018	GLM
A01	4686828	1.8821e-07	2017-2018	GLM
A01	4686834	1.8821e-07	2017-2018	GLM
A01	4683304	1.923e-07	2017-2018	GLM
A01	4686078	1.9966e-07	2017-2018	GLM
A01	4685096	2.0383e-07	2017-2018	GLM
A01	4687541	2.0383e-07	2017-2018	GLM
A01	4649051	2.3752e-07	2017-2018	GLM
A01	4649063	2.3752e-07	2017-2018	GLM
A01	4649132	2.3752e-07	2017-2018	GLM
A01	4682903	2.3752e-07	2017-2018	GLM
A01	4687495	2.3752e-07	2017-2018	GLM
A01	4651114	2.5662e-07	2017-2018	GLM
A01	4651116	2.5662e-07	2017-2018	GLM
A01	4648059	2.6718e-07	2017-2018	GLM
A01	4648067	2.6718e-07	2017-2018	GLM
A01	4648080	2.6718e-07	2017-2018	GLM
A01	4686843	2.7773e-07	2017-2018	GLM
A01	4646242	2.9907e-07	2017-2018	GLM
A01	4646266	2.9907e-07	2017-2018	GLM
A01	4646606	2.9907e-07	2017-2018	GLM
A01	4684919	3.1988e-07	2017-2018	GLM
A01	4686726	3.3044e-07	2017-2018	GLM
A01	4645812	3.4836e-07	2017-2018	GLM
A01	4687032	3.6096e-07	2017-2018	GLM
A01	4687051	3.6096e-07	2017-2018	GLM
A01	4649692	3.8018e-07	2017-2018	GLM
A01	4648139	3.961e-07	2017-2018	GLM
A01	4650700	3.961e-07	2017-2018	GLM
A01	4687419	4.0236e-07	2017-2018	GLM
A01	4687426	4.0236e-07	2017-2018	GLM
A01	4687432	4.0236e-07	2017-2018	GLM
A01	4683260	4.0315e-07	2017-2018	GLM
A01	4671376	4.1283e-07	2017-2018	GLM
A01	4648032	4.2284e-07	2017-2018	GLM
A01	4648036	4.2284e-07	2017-2018	GLM
A01	4686756	4.283e-07	2017-2018	GLM
A01	4648561	4.3013e-07	2017-2018	GLM
A01	4648581	4.3013e-07	2017-2018	GLM
A01	4648583	4.3013e-07	2017-2018	GLM
A01	4648595	4.3013e-07	2017-2018	GLM
A01	4659623	4.3637e-07	2017-2018	GLM
A01	4652161	4.38e-07	2017-2018	GLM
A01	4648184	4.3804e-07	2017-2018	GLM
A01	4609033	4.6465e-07	2017-2018	GLM
A01	4648075	4.6722e-07	2017-2018	GLM
A01	4608859	4.9262e-07	2017-2018	GLM
A01	4647918	5.1114e-07	2017-2018	GLM
A01	4672820	9.1165e-07	2017-2018	GLM
A01	4670911	9.8935e-07	2017-2018	GLM
A01	4650790	1.0012e-06	2017-2018	GLM
A01	4616136	1.078e-06	2017-2018	GLM
A01	4648314	1.0799e-06	2017-2018	GLM
A01	4459542	1.1258e-06	2017-2018	GLM
A01	4459543	1.1258e-06	2017-2018	GLM
A01	4675851	1.3553e-06	2017-2018	GLM
A01	4455669	1.5136e-06	2017-2018	GLM
A01	4671306	1.7047e-06	2017-2018	GLM
A01	4648111	2.0537e-06	2017-2018	GLM
A01	4616497	2.2028e-06	2017-2018	GLM
A01	4649616	2.3824e-06	2017-2018	GLM
A01	4609242	2.4526e-06	2017-2018	GLM
A01	4674002	2.5053e-06	2017-2018	GLM
A01	4673174	2.7232e-06	2017-2018	GLM
A01	4673843	2.7232e-06	2017-2018	GLM
A01	4674050	2.7232e-06	2017-2018	GLM
A01	5038884	2.9523e-06	2017-2018	GLM
A01	5038936	2.9523e-06	2017-2018	GLM
A01	4654693	3.5955e-06	2017-2018	GLM
A01	4682624	3.6992e-06	2017-2018	GLM
A01	4682676	3.6992e-06	2017-2018	GLM
A01	4684537	3.6992e-06	2017-2018	GLM
A01	4685166	3.6992e-06	2017-2018	GLM
A01	4685199	3.6992e-06	2017-2018	GLM
A01	4675472	3.821e-06	2017-2018	GLM
A01	4676139	5.0945e-06	2017-2018	GLM
A01	4673441	5.377e-06	2017-2018	GLM
A01	4498113	6.5964e-06	2017-2018	GLM
A01	4498158	6.5964e-06	2017-2018	GLM
A01	4498164	6.5964e-06	2017-2018	GLM
A01	4683552	6.5964e-06	2017-2018	GLM
A01	4683749	6.5964e-06	2017-2018	GLM
A01	4683754	6.5964e-06	2017-2018	GLM
A01	4684207	6.5964e-06	2017-2018	GLM
A01	4685193	6.5964e-06	2017-2018	GLM
A01	4686060	6.5964e-06	2017-2018	GLM
A01	4684796	6.83e-06	2017-2018	GLM
A01	4657095	8.5725e-06	2017-2018	GLM
A01	4498194	8.9396e-06	2017-2018	GLM
A01	4615998	9.5895e-06	2017-2018	GLM
A01	4616226	9.5895e-06	2017-2018	GLM
A01	972312	2.97474e-06	2018-2019	BLINK
A01	4772232	1.71325e-09	2018-2019	BLINK
A01	4685096	1.16743e-08	2018-2019	MLM
A01	4687541	1.16743e-08	2018-2019	MLM
A01	4684723	1.18758e-08	2018-2019	MLM
A01	4683163	2.18875e-08	2018-2019	MLM
A01	4683208	2.18875e-08	2018-2019	MLM
A01	4685706	2.18875e-08	2018-2019	MLM
A01	4685713	2.18875e-08	2018-2019	MLM
A01	4686447	2.18875e-08	2018-2019	MLM
A01	4686456	2.18875e-08	2018-2019	MLM
A01	4686555	2.18875e-08	2018-2019	MLM
A01	4686585	2.18875e-08	2018-2019	MLM
A01	4686588	2.18875e-08	2018-2019	MLM
A01	4684117	3.06206e-08	2018-2019	MLM
A01	4686078	3.3097e-08	2018-2019	MLM
A01	4686094	3.32241e-08	2018-2019	MLM
A01	4686095	3.32241e-08	2018-2019	MLM
A01	4683304	3.84213e-08	2018-2019	MLM
A01	4687224	5.13526e-08	2018-2019	MLM
A01	4687419	6.66269e-08	2018-2019	MLM
A01	4687426	6.66269e-08	2018-2019	MLM
A01	4687432	6.66269e-08	2018-2019	MLM
A01	4686159	8.31927e-08	2018-2019	MLM
A01	4684919	8.49623e-08	2018-2019	MLM
A01	4679293	1.28641e-07	2018-2019	MLM
A01	4679602	1.28641e-07	2018-2019	MLM
A01	4679928	1.28641e-07	2018-2019	MLM
A01	4680159	1.28641e-07	2018-2019	MLM
A01	4680166	1.28641e-07	2018-2019	MLM
A01	4681255	1.28641e-07	2018-2019	MLM
A01	4681587	1.28641e-07	2018-2019	MLM
A01	4681692	1.28641e-07	2018-2019	MLM
A01	4681729	1.28641e-07	2018-2019	MLM
A01	4681730	1.28641e-07	2018-2019	MLM
A01	4682100	1.28641e-07	2018-2019	MLM
A01	4682111	1.28641e-07	2018-2019	MLM
A01	4682116	1.28641e-07	2018-2019	MLM
A01	4683394	1.28641e-07	2018-2019	MLM
A01	4684205	1.28641e-07	2018-2019	MLM
A01	4687116	1.36897e-07	2018-2019	MLM
A01	4686756	2.05935e-07	2018-2019	MLM
A01	4682903	2.09237e-07	2018-2019	MLM
A01	4687495	2.09237e-07	2018-2019	MLM
A01	4683260	2.18012e-07	2018-2019	MLM
A01	4648032	2.30186e-07	2018-2019	MLM
A01	4648036	2.30186e-07	2018-2019	MLM
A01	4686726	2.34268e-07	2018-2019	MLM
A01	4686798	2.35303e-07	2018-2019	MLM
A01	4686807	2.35303e-07	2018-2019	MLM
A01	4686810	2.35303e-07	2018-2019	MLM
A01	4683795	2.47776e-07	2018-2019	MLM
A01	4648075	3.33598e-07	2018-2019	MLM
A01	4686843	3.38579e-07	2018-2019	MLM
A01	4652161	3.38615e-07	2018-2019	MLM
A01	4671376	3.5872e-07	2018-2019	MLM
A01	4648059	3.69936e-07	2018-2019	MLM
A01	4648067	3.69936e-07	2018-2019	MLM
A01	4648080	3.69936e-07	2018-2019	MLM
A01	4686795	3.80109e-07	2018-2019	MLM
A01	4686828	3.80109e-07	2018-2019	MLM
A01	4686834	3.80109e-07	2018-2019	MLM
A01	4640691	3.98101e-07	2018-2019	MLM
A01	4687263	4.18152e-07	2018-2019	MLM
A01	4649051	5.31389e-07	2018-2019	MLM
A01	4649063	5.31389e-07	2018-2019	MLM
A01	4675851	6.20684e-07	2018-2019	MLM
A01	4649132	6.34087e-07	2018-2019	MLM
A01	4687032	7.72939e-07	2018-2019	MLM
A01	4687051	7.72939e-07	2018-2019	MLM
A01	4678305	8.59288e-07	2018-2019	MLM
A01	4678834	8.59288e-07	2018-2019	MLM
A01	4600143	1.0283e-06	2018-2019	MLM
A01	4654693	1.11721e-06	2018-2019	MLM
A01	4608859	1.12793e-06	2018-2019	MLM
A01	4676139	1.20595e-06	2018-2019	MLM
A01	4657268	1.48202e-06	2018-2019	MLM
A01	4659623	1.51067e-06	2018-2019	MLM
A01	4646242	1.53544e-06	2018-2019	MLM
A01	4646266	1.53544e-06	2018-2019	MLM
A01	4646606	1.53544e-06	2018-2019	MLM
A01	4647918	1.54408e-06	2018-2019	MLM
A01	4616074	1.64257e-06	2018-2019	MLM
A01	4672820	1.70758e-06	2018-2019	MLM
A01	4674002	1.71274e-06	2018-2019	MLM
A01	4672398	1.82791e-06	2018-2019	MLM
A01	4672596	1.82791e-06	2018-2019	MLM
A01	4649191	2.02364e-06	2018-2019	MLM
A01	4651114	2.2866e-06	2018-2019	MLM
A01	4651116	2.2866e-06	2018-2019	MLM
A01	4671306	2.33379e-06	2018-2019	MLM
A01	4640904	2.4484e-06	2018-2019	MLM
A01	4644734	2.4484e-06	2018-2019	MLM
A01	4646230	2.4484e-06	2018-2019	MLM
A01	4655885	2.4484e-06	2018-2019	MLM
A01	4656066	2.4484e-06	2018-2019	MLM
A01	4656068	2.4484e-06	2018-2019	MLM
A01	4656155	2.4484e-06	2018-2019	MLM
A01	4658953	2.4484e-06	2018-2019	MLM
A01	4670138	2.4484e-06	2018-2019	MLM
A01	4648139	2.4783e-06	2018-2019	MLM
A01	4650700	2.4783e-06	2018-2019	MLM
A01	4600222	2.50227e-06	2018-2019	MLM
A01	4615998	2.55181e-06	2018-2019	MLM
A01	4616226	2.55181e-06	2018-2019	MLM
A01	4674486	2.62031e-06	2018-2019	MLM
A01	4674500	2.62031e-06	2018-2019	MLM
A01	4674505	2.62031e-06	2018-2019	MLM
A01	4674516	2.62031e-06	2018-2019	MLM
A01	4669375	2.63844e-06	2018-2019	MLM
A01	4650790	2.9292e-06	2018-2019	MLM
A01	4616136	3.08147e-06	2018-2019	MLM
A01	4640750	3.35232e-06	2018-2019	MLM
A01	4645802	3.88898e-06	2018-2019	MLM
A01	4648348	3.88898e-06	2018-2019	MLM
A01	4648353	3.88898e-06	2018-2019	MLM
A01	4648428	3.88898e-06	2018-2019	MLM
A01	4654321	3.88898e-06	2018-2019	MLM
A01	4649692	4.07853e-06	2018-2019	MLM
A01	4675472	4.09709e-06	2018-2019	MLM
A01	4648184	4.22991e-06	2018-2019	MLM
A01	4670911	4.31676e-06	2018-2019	MLM
A01	4648561	4.37517e-06	2018-2019	MLM
A01	4648581	4.37517e-06	2018-2019	MLM
A01	4648583	4.37517e-06	2018-2019	MLM
A01	4648595	4.37517e-06	2018-2019	MLM
A01	4673441	4.78745e-06	2018-2019	MLM
A01	4778943	4.88005e-06	2018-2019	MLM
A01	4684702	5.25504e-06	2018-2019	MLM
A01	4684705	5.25504e-06	2018-2019	MLM
A01	4684730	5.25504e-06	2018-2019	MLM
A01	4684734	5.25504e-06	2018-2019	MLM
A01	4685550	5.26029e-06	2018-2019	MLM
A01	4685556	5.26029e-06	2018-2019	MLM
A01	4685119	5.5824e-06	2018-2019	MLM
A01	4657242	5.92347e-06	2018-2019	MLM
A01	4046540	6.27201e-06	2018-2019	MLM
A01	4656978	6.79506e-06	2018-2019	MLM
A01	4645812	7.01068e-06	2018-2019	MLM
A01	4649616	7.17746e-06	2018-2019	MLM
A01	4047023	8.3533e-06	2018-2019	MLM
A01	4673174	8.63372e-06	2018-2019	MLM
A01	4673843	8.63372e-06	2018-2019	MLM
A01	4674050	8.63372e-06	2018-2019	MLM
A01	4682624	9.0578e-06	2018-2019	MLM
A01	4682676	9.0578e-06	2018-2019	MLM
A01	4684537	9.0578e-06	2018-2019	MLM
A01	4685166	9.0578e-06	2018-2019	MLM
A01	4685199	9.0578e-06	2018-2019	MLM
A01	4046709	9.24028e-06	2018-2019	MLM
A01	4676556	9.45177e-06	2018-2019	MLM
A01	4657095	9.58645e-06	2018-2019	MLM
A01	4626652	9.6022e-06	2018-2019	MLM
A01	4668804	9.6022e-06	2018-2019	MLM
A01	4670906	9.6022e-06	2018-2019	MLM
A01	3353019	9.77227e-06	2018-2019	MLM
A01	4648314	9.9185e-06	2018-2019	MLM
A01	4683163	5.677e-09	2018-2019	GLM
A01	4683208	5.677e-09	2018-2019	GLM
A01	4685706	5.677e-09	2018-2019	GLM
A01	4685713	5.677e-09	2018-2019	GLM
A01	4686447	5.677e-09	2018-2019	GLM
A01	4686456	5.677e-09	2018-2019	GLM
A01	4686555	5.677e-09	2018-2019	GLM
A01	4686585	5.677e-09	2018-2019	GLM
A01	4686588	5.677e-09	2018-2019	GLM
A01	4687419	1.5289e-08	2018-2019	GLM
A01	4687426	1.5289e-08	2018-2019	GLM
A01	4687432	1.5289e-08	2018-2019	GLM
A01	4685096	1.8009e-08	2018-2019	GLM
A01	4687541	1.8009e-08	2018-2019	GLM
A01	4686159	2.3898e-08	2018-2019	GLM
A01	4684723	2.781e-08	2018-2019	GLM
A01	4686078	3.6609e-08	2018-2019	GLM
A01	4687224	4.2676e-08	2018-2019	GLM
A01	4686094	4.3584e-08	2018-2019	GLM
A01	4686095	4.3584e-08	2018-2019	GLM
A01	4683304	4.4073e-08	2018-2019	GLM
A01	4684117	4.4081e-08	2018-2019	GLM
A01	4678305	4.5753e-08	2018-2019	GLM
A01	4678834	4.5753e-08	2018-2019	GLM
A01	4679293	4.8729e-08	2018-2019	GLM
A01	4679602	4.8729e-08	2018-2019	GLM
A01	4679928	4.8729e-08	2018-2019	GLM
A01	4680159	4.8729e-08	2018-2019	GLM
A01	4680166	4.8729e-08	2018-2019	GLM
A01	4681255	4.8729e-08	2018-2019	GLM
A01	4681587	4.8729e-08	2018-2019	GLM
A01	4681692	4.8729e-08	2018-2019	GLM
A01	4681729	4.8729e-08	2018-2019	GLM
A01	4681730	4.8729e-08	2018-2019	GLM
A01	4682100	4.8729e-08	2018-2019	GLM
A01	4682111	4.8729e-08	2018-2019	GLM
A01	4682116	4.8729e-08	2018-2019	GLM
A01	4683394	4.8729e-08	2018-2019	GLM
A01	4684205	4.8729e-08	2018-2019	GLM
A01	4674486	9.673e-08	2018-2019	GLM
A01	4674500	9.673e-08	2018-2019	GLM
A01	4674505	9.673e-08	2018-2019	GLM
A01	4674516	9.673e-08	2018-2019	GLM
A01	4687263	1.0509e-07	2018-2019	GLM
A01	4646242	1.2514e-07	2018-2019	GLM
A01	4646266	1.2514e-07	2018-2019	GLM
A01	4646606	1.2514e-07	2018-2019	GLM
A01	4651114	1.4247e-07	2018-2019	GLM
A01	4651116	1.4247e-07	2018-2019	GLM
A01	4640904	1.4406e-07	2018-2019	GLM
A01	4644734	1.4406e-07	2018-2019	GLM
A01	4646230	1.4406e-07	2018-2019	GLM
A01	4655885	1.4406e-07	2018-2019	GLM
A01	4656066	1.4406e-07	2018-2019	GLM
A01	4656068	1.4406e-07	2018-2019	GLM
A01	4656155	1.4406e-07	2018-2019	GLM
A01	4658953	1.4406e-07	2018-2019	GLM
A01	4670138	1.4406e-07	2018-2019	GLM
A01	4640691	1.588e-07	2018-2019	GLM
A01	4687116	1.9698e-07	2018-2019	GLM
A01	4687032	1.9709e-07	2018-2019	GLM
A01	4687051	1.9709e-07	2018-2019	GLM
A01	4654693	2.0529e-07	2018-2019	GLM
A01	4684919	2.257e-07	2018-2019	GLM
A01	4647918	2.4681e-07	2018-2019	GLM
A01	4052028	2.7599e-07	2018-2019	GLM
A01	4682903	2.9836e-07	2018-2019	GLM
A01	4687495	2.9836e-07	2018-2019	GLM
A01	4686843	3.002e-07	2018-2019	GLM
A01	4659623	3.1044e-07	2018-2019	GLM
A01	4686795	3.2248e-07	2018-2019	GLM
A01	4686828	3.2248e-07	2018-2019	GLM
A01	4686834	3.2248e-07	2018-2019	GLM
A01	4686798	3.3054e-07	2018-2019	GLM
A01	4686807	3.3054e-07	2018-2019	GLM
A01	4686810	3.3054e-07	2018-2019	GLM
A01	4683795	3.454e-07	2018-2019	GLM
A01	4686756	3.4764e-07	2018-2019	GLM
A01	4683260	3.4893e-07	2018-2019	GLM
A01	4686726	3.5386e-07	2018-2019	GLM
A01	4648075	4.8411e-07	2018-2019	GLM
A01	4648032	5.4074e-07	2018-2019	GLM
A01	4648036	5.4074e-07	2018-2019	GLM
A01	4675851	5.7533e-07	2018-2019	GLM
A01	4600143	6.0244e-07	2018-2019	GLM
A01	4648314	6.1423e-07	2018-2019	GLM
A01	4609033	6.7808e-07	2018-2019	GLM
A01	4649191	8.483e-07	2018-2019	GLM
A01	4626652	9.1528e-07	2018-2019	GLM
A01	4668804	9.1528e-07	2018-2019	GLM
A01	4670906	9.1528e-07	2018-2019	GLM
A01	4649132	9.4504e-07	2018-2019	GLM
A01	4648059	1.0048e-06	2018-2019	GLM
A01	4648067	1.0048e-06	2018-2019	GLM
A01	4648080	1.0048e-06	2018-2019	GLM
A01	4648561	1.0324e-06	2018-2019	GLM
A01	4648581	1.0324e-06	2018-2019	GLM
A01	4648583	1.0324e-06	2018-2019	GLM
A01	4648595	1.0324e-06	2018-2019	GLM
A01	4671376	1.0494e-06	2018-2019	GLM
A01	4672398	1.0731e-06	2018-2019	GLM
A01	4672596	1.0731e-06	2018-2019	GLM
A01	4648184	1.0764e-06	2018-2019	GLM
A01	4645812	1.0808e-06	2018-2019	GLM
A01	4652161	1.0898e-06	2018-2019	GLM
A01	4673174	1.0899e-06	2018-2019	GLM
A01	4673843	1.0899e-06	2018-2019	GLM
A01	4674050	1.0899e-06	2018-2019	GLM
A01	4649051	1.1106e-06	2018-2019	GLM
A01	4649063	1.1106e-06	2018-2019	GLM
A01	4657268	1.3055e-06	2018-2019	GLM
A01	4616074	1.4308e-06	2018-2019	GLM
A01	4671306	1.4443e-06	2018-2019	GLM
A01	4669375	1.784e-06	2018-2019	GLM
A01	4674002	2.0154e-06	2018-2019	GLM
A01	4682624	2.7928e-06	2018-2019	GLM
A01	4682676	2.7928e-06	2018-2019	GLM
A01	4684537	2.7928e-06	2018-2019	GLM
A01	4685166	2.7928e-06	2018-2019	GLM
A01	4685199	2.7928e-06	2018-2019	GLM
A01	4608859	2.8723e-06	2018-2019	GLM
A01	4778213	2.9697e-06	2018-2019	GLM
A01	4648139	3.1007e-06	2018-2019	GLM
A01	4650700	3.1007e-06	2018-2019	GLM
A01	4675472	3.3433e-06	2018-2019	GLM
A01	4650790	3.4668e-06	2018-2019	GLM
A01	4781765	3.6077e-06	2018-2019	GLM
A01	4676139	3.8449e-06	2018-2019	GLM
A01	4649692	3.9982e-06	2018-2019	GLM
A01	4600222	4.0042e-06	2018-2019	GLM
A01	4670911	4.086e-06	2018-2019	GLM
A01	4778943	4.1704e-06	2018-2019	GLM
A01	4053614	4.349e-06	2018-2019	GLM
A01	4672820	5.3045e-06	2018-2019	GLM
A01	4640750	5.3296e-06	2018-2019	GLM
A01	4685550	5.7825e-06	2018-2019	GLM
A01	4685556	5.7825e-06	2018-2019	GLM
A01	4645802	5.8215e-06	2018-2019	GLM
A01	4648348	5.8215e-06	2018-2019	GLM
A01	4648353	5.8215e-06	2018-2019	GLM
A01	4648428	5.8215e-06	2018-2019	GLM
A01	4654321	5.8215e-06	2018-2019	GLM
A01	4616136	6.689e-06	2018-2019	GLM
A01	4673441	7.1769e-06	2018-2019	GLM
A01	4054112	7.1828e-06	2018-2019	GLM
A01	4053464	7.9633e-06	2018-2019	GLM
A01	4615998	8.0591e-06	2018-2019	GLM
A01	4616226	8.0591e-06	2018-2019	GLM
A01	4685119	8.46e-06	2018-2019	GLM
A01	4455669	8.723e-06	2018-2019	GLM
A02	4046709	9.0776e-06	2018-2019	GLM
A03	3353019	9.103e-06	2018-2019	GLM
A04	4772232	2.91742e-21	BLUP	BLINK
A05	7192078	7.99973e-06	BLUP	BLINK
A01	4684723	3.92165e-10	BLUP	MLM
A01	4685096	6.28828e-10	BLUP	MLM
A01	4687541	6.28828e-10	BLUP	MLM
A01	4687224	7.94282e-10	BLUP	MLM
A01	4684117	9.21385e-10	BLUP	MLM
A01	4683163	1.05292e-09	BLUP	MLM
A01	4683208	1.05292e-09	BLUP	MLM
A01	4685706	1.05292e-09	BLUP	MLM
A01	4685713	1.05292e-09	BLUP	MLM
A01	4686447	1.05292e-09	BLUP	MLM
A01	4686456	1.05292e-09	BLUP	MLM
A01	4686555	1.05292e-09	BLUP	MLM
A01	4686585	1.05292e-09	BLUP	MLM
A01	4686588	1.05292e-09	BLUP	MLM
A01	4686078	1.07526e-09	BLUP	MLM
A01	4684919	1.48582e-09	BLUP	MLM
A01	4683304	1.54945e-09	BLUP	MLM
A01	4686798	2.073e-09	BLUP	MLM
A01	4686807	2.073e-09	BLUP	MLM
A01	4686810	2.073e-09	BLUP	MLM
A01	4682903	2.86784e-09	BLUP	MLM
A01	4687495	2.86784e-09	BLUP	MLM
A01	4686795	3.02483e-09	BLUP	MLM
A01	4686828	3.02483e-09	BLUP	MLM
A01	4686834	3.02483e-09	BLUP	MLM
A01	4683795	3.13146e-09	BLUP	MLM
A01	4679293	3.24877e-09	BLUP	MLM
A01	4679602	3.24877e-09	BLUP	MLM
A01	4679928	3.24877e-09	BLUP	MLM
A01	4680159	3.24877e-09	BLUP	MLM
A01	4680166	3.24877e-09	BLUP	MLM
A01	4681255	3.24877e-09	BLUP	MLM
A01	4681587	3.24877e-09	BLUP	MLM
A01	4681692	3.24877e-09	BLUP	MLM
A01	4681729	3.24877e-09	BLUP	MLM
A01	4681730	3.24877e-09	BLUP	MLM
A01	4682100	3.24877e-09	BLUP	MLM
A01	4682111	3.24877e-09	BLUP	MLM
A01	4682116	3.24877e-09	BLUP	MLM
A01	4683394	3.24877e-09	BLUP	MLM
A01	4684205	3.24877e-09	BLUP	MLM
A01	4686726	3.4537e-09	BLUP	MLM
A01	4687116	3.65717e-09	BLUP	MLM
A01	4686843	4.19522e-09	BLUP	MLM
A01	4683260	4.60923e-09	BLUP	MLM
A01	4686756	4.69234e-09	BLUP	MLM
A01	4686094	5.58859e-09	BLUP	MLM
A01	4686095	5.58859e-09	BLUP	MLM
A01	4687263	5.70219e-09	BLUP	MLM
A01	4687419	6.6624e-09	BLUP	MLM
A01	4687426	6.6624e-09	BLUP	MLM
A01	4687432	6.6624e-09	BLUP	MLM
A01	4608859	8.15954e-09	BLUP	MLM
A01	4687032	2.33849e-08	BLUP	MLM
A01	4687051	2.33849e-08	BLUP	MLM
A01	4686159	4.68174e-08	BLUP	MLM
A01	4678305	4.96817e-08	BLUP	MLM
A01	4678834	4.96817e-08	BLUP	MLM
A01	4616074	5.14991e-08	BLUP	MLM
A01	4676139	5.32072e-08	BLUP	MLM
A01	4648059	6.74977e-08	BLUP	MLM
A01	4648067	6.74977e-08	BLUP	MLM
A01	4648080	6.74977e-08	BLUP	MLM
A01	4648032	7.37362e-08	BLUP	MLM
A01	4648036	7.37362e-08	BLUP	MLM
A01	4648075	7.4122e-08	BLUP	MLM
A01	4652161	8.06444e-08	BLUP	MLM
A01	4649132	1.01721e-07	BLUP	MLM
A01	4640691	1.09827e-07	BLUP	MLM
A01	4600143	1.25136e-07	BLUP	MLM
A01	4671376	1.42593e-07	BLUP	MLM
A01	4616136	1.52302e-07	BLUP	MLM
A01	4615998	1.57728e-07	BLUP	MLM
A01	4616226	1.57728e-07	BLUP	MLM
A01	4649191	1.58872e-07	BLUP	MLM
A01	4684702	1.84567e-07	BLUP	MLM
A01	4684705	1.84567e-07	BLUP	MLM
A01	4684730	1.84567e-07	BLUP	MLM
A01	4684734	1.84567e-07	BLUP	MLM
A01	4675851	2.0909e-07	BLUP	MLM
A01	4609242	2.18173e-07	BLUP	MLM
A01	4672398	2.32266e-07	BLUP	MLM
A01	4672596	2.32266e-07	BLUP	MLM
A01	4672820	2.39202e-07	BLUP	MLM
A01	4649051	2.45279e-07	BLUP	MLM
A01	4649063	2.45279e-07	BLUP	MLM
A01	4609033	2.81694e-07	BLUP	MLM
A01	4685119	2.97637e-07	BLUP	MLM
A01	4685550	3.04681e-07	BLUP	MLM
A01	4685556	3.04681e-07	BLUP	MLM
A01	4659623	3.34032e-07	BLUP	MLM
A01	4616497	3.55279e-07	BLUP	MLM
A01	4674486	3.68562e-07	BLUP	MLM
A01	4674500	3.68562e-07	BLUP	MLM
A01	4674505	3.68562e-07	BLUP	MLM
A01	4674516	3.68562e-07	BLUP	MLM
A01	4682346	3.7626e-07	BLUP	MLM
A01	4682624	4.50712e-07	BLUP	MLM
A01	4682676	4.50712e-07	BLUP	MLM
A01	4684537	4.50712e-07	BLUP	MLM
A01	4685166	4.50712e-07	BLUP	MLM
A01	4685199	4.50712e-07	BLUP	MLM
A01	4600222	5.37672e-07	BLUP	MLM
A01	4685058	6.51479e-07	BLUP	MLM
A01	4674002	6.97802e-07	BLUP	MLM
A01	4648561	8.52177e-07	BLUP	MLM
A01	4648581	8.52177e-07	BLUP	MLM
A01	4648583	8.52177e-07	BLUP	MLM
A01	4648595	8.52177e-07	BLUP	MLM
A01	4648139	8.55225e-07	BLUP	MLM
A01	4650700	8.55225e-07	BLUP	MLM
A01	4682768	8.76621e-07	BLUP	MLM
A01	4682788	8.76621e-07	BLUP	MLM
A01	4647918	8.80221e-07	BLUP	MLM
A01	4669375	8.87772e-07	BLUP	MLM
A01	4646242	9.35341e-07	BLUP	MLM
A01	4646266	9.35341e-07	BLUP	MLM
A01	4646606	9.35341e-07	BLUP	MLM
A01	4688060	9.48777e-07	BLUP	MLM
A01	4498194	1.04985e-06	BLUP	MLM
A01	4654693	1.06279e-06	BLUP	MLM
A01	4673441	1.06634e-06	BLUP	MLM
A01	4648184	1.06635e-06	BLUP	MLM
A01	4778943	1.13753e-06	BLUP	MLM
A01	4645802	1.16993e-06	BLUP	MLM
A01	4648348	1.16993e-06	BLUP	MLM
A01	4648353	1.16993e-06	BLUP	MLM
A01	4648428	1.16993e-06	BLUP	MLM
A01	4654321	1.16993e-06	BLUP	MLM
A01	4640904	1.19552e-06	BLUP	MLM
A01	4644734	1.19552e-06	BLUP	MLM
A01	4646230	1.19552e-06	BLUP	MLM
A01	4655885	1.19552e-06	BLUP	MLM
A01	4656066	1.19552e-06	BLUP	MLM
A01	4656068	1.19552e-06	BLUP	MLM
A01	4656155	1.19552e-06	BLUP	MLM
A01	4658953	1.19552e-06	BLUP	MLM
A01	4670138	1.19552e-06	BLUP	MLM
A01	4682407	1.25127e-06	BLUP	MLM
A01	4682434	1.25127e-06	BLUP	MLM
A01	4682435	1.25127e-06	BLUP	MLM
A01	4682460	1.25127e-06	BLUP	MLM
A01	4682473	1.25127e-06	BLUP	MLM
A01	4682474	1.25127e-06	BLUP	MLM
A01	4498113	1.28921e-06	BLUP	MLM
A01	4498158	1.28921e-06	BLUP	MLM
A01	4498164	1.28921e-06	BLUP	MLM
A01	4683552	1.28921e-06	BLUP	MLM
A01	4683749	1.28921e-06	BLUP	MLM
A01	4683754	1.28921e-06	BLUP	MLM
A01	4684207	1.28921e-06	BLUP	MLM
A01	4685193	1.28921e-06	BLUP	MLM
A01	4686060	1.28921e-06	BLUP	MLM
A01	4686731	1.33207e-06	BLUP	MLM
A01	4675472	1.36362e-06	BLUP	MLM
A01	4684986	1.39943e-06	BLUP	MLM
A01	4650790	1.42937e-06	BLUP	MLM
A01	4651114	1.48765e-06	BLUP	MLM
A01	4651116	1.48765e-06	BLUP	MLM
A01	4657268	1.54503e-06	BLUP	MLM
A01	4648314	1.58844e-06	BLUP	MLM
A01	4682849	1.60354e-06	BLUP	MLM
A01	4682850	1.60354e-06	BLUP	MLM
A01	4671306	1.60436e-06	BLUP	MLM
A01	4676556	1.71258e-06	BLUP	MLM
A01	4649692	1.73532e-06	BLUP	MLM
A01	4686744	1.81523e-06	BLUP	MLM
A01	4047384	1.82398e-06	BLUP	MLM
A01	4047395	1.82398e-06	BLUP	MLM
A01	4684796	1.93932e-06	BLUP	MLM
A01	4054666	2.12519e-06	BLUP	MLM
A01	4670911	2.14013e-06	BLUP	MLM
A01	3353019	2.16754e-06	BLUP	MLM
A01	4626652	2.24972e-06	BLUP	MLM
A01	4668804	2.24972e-06	BLUP	MLM
A01	4670906	2.24972e-06	BLUP	MLM
A01	4046709	2.50748e-06	BLUP	MLM
A01	4640750	2.60979e-06	BLUP	MLM
A01	4046540	2.73381e-06	BLUP	MLM
A01	4645812	2.88408e-06	BLUP	MLM
A01	4046978	3.07721e-06	BLUP	MLM
A01	4649616	3.11556e-06	BLUP	MLM
A01	4648111	3.15633e-06	BLUP	MLM
A01	4656978	3.39007e-06	BLUP	MLM
A01	4047023	3.41433e-06	BLUP	MLM
A01	4046772	3.95244e-06	BLUP	MLM
A01	4046784	3.95244e-06	BLUP	MLM
A01	4046822	4.33808e-06	BLUP	MLM
A01	4046876	4.33808e-06	BLUP	MLM
A01	4616217	4.38345e-06	BLUP	MLM
A01	4657095	4.87196e-06	BLUP	MLM
A01	4054112	5.33412e-06	BLUP	MLM
A01	4783233	5.45192e-06	BLUP	MLM
A01	4673174	5.73972e-06	BLUP	MLM
A01	4673843	5.73972e-06	BLUP	MLM
A01	4674050	5.73972e-06	BLUP	MLM
A01	4657242	6.1971e-06	BLUP	MLM
A01	4775872	6.96423e-06	BLUP	MLM
A01	4639312	7.02068e-06	BLUP	MLM
A01	4668432	7.16638e-06	BLUP	MLM
A01	5452684	8.04181e-06	BLUP	MLM
A01	5502633	9.77526e-06	BLUP	MLM
A01	4683163	3.1546e-10	BLUP	GLM
A01	4683208	3.1546e-10	BLUP	GLM
A01	4685706	3.1546e-10	BLUP	GLM
A01	4685713	3.1546e-10	BLUP	GLM
A01	4686447	3.1546e-10	BLUP	GLM
A01	4686456	3.1546e-10	BLUP	GLM
A01	4686555	3.1546e-10	BLUP	GLM
A01	4686585	3.1546e-10	BLUP	GLM
A01	4686588	3.1546e-10	BLUP	GLM
A01	4678305	3.846e-10	BLUP	GLM
A01	4678834	3.846e-10	BLUP	GLM
A01	4686094	6.4105e-10	BLUP	GLM
A01	4686095	6.4105e-10	BLUP	GLM
A01	4684723	1.204e-09	BLUP	GLM
A01	4679293	1.3623e-09	BLUP	GLM
A01	4679602	1.3623e-09	BLUP	GLM
A01	4679928	1.3623e-09	BLUP	GLM
A01	4680159	1.3623e-09	BLUP	GLM
A01	4680166	1.3623e-09	BLUP	GLM
A01	4681255	1.3623e-09	BLUP	GLM
A01	4681587	1.3623e-09	BLUP	GLM
A01	4681692	1.3623e-09	BLUP	GLM
A01	4681729	1.3623e-09	BLUP	GLM
A01	4681730	1.3623e-09	BLUP	GLM
A01	4682100	1.3623e-09	BLUP	GLM
A01	4682111	1.3623e-09	BLUP	GLM
A01	4682116	1.3623e-09	BLUP	GLM
A01	4683394	1.3623e-09	BLUP	GLM
A01	4684205	1.3623e-09	BLUP	GLM
A01	4685096	1.7351e-09	BLUP	GLM
A01	4687541	1.7351e-09	BLUP	GLM
A01	4687419	2.0473e-09	BLUP	GLM
A01	4687426	2.0473e-09	BLUP	GLM
A01	4687432	2.0473e-09	BLUP	GLM
A01	4687224	2.1517e-09	BLUP	GLM
A01	4684117	2.4071e-09	BLUP	GLM
A01	4683304	2.5871e-09	BLUP	GLM
A01	4686078	2.6666e-09	BLUP	GLM
A01	4674486	3.5542e-09	BLUP	GLM
A01	4674500	3.5542e-09	BLUP	GLM
A01	4674505	3.5542e-09	BLUP	GLM
A01	4674516	3.5542e-09	BLUP	GLM
A01	4687263	3.9302e-09	BLUP	GLM
A01	4687116	5.4612e-09	BLUP	GLM
A01	4684919	5.6853e-09	BLUP	GLM
A01	4616074	6.015e-09	BLUP	GLM
A01	4686798	7.5652e-09	BLUP	GLM
A01	4686807	7.5652e-09	BLUP	GLM
A01	4686810	7.5652e-09	BLUP	GLM
A01	4683795	8.1716e-09	BLUP	GLM
A01	4686795	8.3655e-09	BLUP	GLM
A01	4686828	8.3655e-09	BLUP	GLM
A01	4686834	8.3655e-09	BLUP	GLM
A01	4687032	8.6601e-09	BLUP	GLM
A01	4687051	8.6601e-09	BLUP	GLM
A01	4686726	9.4909e-09	BLUP	GLM
A01	4682903	9.9024e-09	BLUP	GLM
A01	4687495	9.9024e-09	BLUP	GLM
A01	4686843	1.0308e-08	BLUP	GLM
A01	4609033	1.0759e-08	BLUP	GLM
A01	4683260	1.089e-08	BLUP	GLM
A01	4686756	1.1061e-08	BLUP	GLM
A01	4640904	1.404e-08	BLUP	GLM
A01	4644734	1.404e-08	BLUP	GLM
A01	4646230	1.404e-08	BLUP	GLM
A01	4655885	1.404e-08	BLUP	GLM
A01	4656066	1.404e-08	BLUP	GLM
A01	4656068	1.404e-08	BLUP	GLM
A01	4656155	1.404e-08	BLUP	GLM
A01	4658953	1.404e-08	BLUP	GLM
A01	4670138	1.404e-08	BLUP	GLM
A01	4686159	1.6729e-08	BLUP	GLM
A01	4626652	2.9461e-08	BLUP	GLM
A01	4668804	2.9461e-08	BLUP	GLM
A01	4670906	2.9461e-08	BLUP	GLM
A01	4608859	3.4715e-08	BLUP	GLM
A01	4640691	5.1604e-08	BLUP	GLM
A01	4052028	6.754e-08	BLUP	GLM
A01	4675851	7.4492e-08	BLUP	GLM
A01	4651114	7.6706e-08	BLUP	GLM
A01	4651116	7.6706e-08	BLUP	GLM
A01	4646242	8.069e-08	BLUP	GLM
A01	4646266	8.069e-08	BLUP	GLM
A01	4646606	8.069e-08	BLUP	GLM
A01	4672398	1.114e-07	BLUP	GLM
A01	4672596	1.114e-07	BLUP	GLM
A01	4669375	1.2206e-07	BLUP	GLM
A01	4616136	1.3988e-07	BLUP	GLM
A01	4455669	1.4179e-07	BLUP	GLM
A01	4459542	1.4188e-07	BLUP	GLM
A01	4459543	1.4188e-07	BLUP	GLM
A01	4676139	1.6407e-07	BLUP	GLM
A01	4647918	1.6535e-07	BLUP	GLM
A01	4682624	1.6793e-07	BLUP	GLM
A01	4682676	1.6793e-07	BLUP	GLM
A01	4684537	1.6793e-07	BLUP	GLM
A01	4685166	1.6793e-07	BLUP	GLM
A01	4685199	1.6793e-07	BLUP	GLM
A01	4649191	1.7431e-07	BLUP	GLM
A01	4659623	2.5183e-07	BLUP	GLM
A01	4600143	2.5309e-07	BLUP	GLM
A01	4648059	2.6346e-07	BLUP	GLM
A01	4648067	2.6346e-07	BLUP	GLM
A01	4648080	2.6346e-07	BLUP	GLM
A01	4648032	2.8742e-07	BLUP	GLM
A01	4648036	2.8742e-07	BLUP	GLM
A01	4645802	2.9747e-07	BLUP	GLM
A01	4648348	2.9747e-07	BLUP	GLM
A01	4648353	2.9747e-07	BLUP	GLM
A01	4648428	2.9747e-07	BLUP	GLM
A01	4654321	2.9747e-07	BLUP	GLM
A01	4648075	3.3765e-07	BLUP	GLM
A01	4645812	3.3911e-07	BLUP	GLM
A01	4649132	3.4232e-07	BLUP	GLM
A01	4648561	3.5153e-07	BLUP	GLM
A01	4648581	3.5153e-07	BLUP	GLM
A01	4648583	3.5153e-07	BLUP	GLM
A01	4648595	3.5153e-07	BLUP	GLM
A01	4649051	3.5999e-07	BLUP	GLM
A01	4649063	3.5999e-07	BLUP	GLM
A01	4652161	3.6392e-07	BLUP	GLM
A01	4648184	3.678e-07	BLUP	GLM
A01	4671376	3.7341e-07	BLUP	GLM
A01	4053614	4.0743e-07	BLUP	GLM
A01	4616497	4.1705e-07	BLUP	GLM
A01	4648314	4.2744e-07	BLUP	GLM
A01	4600222	4.5238e-07	BLUP	GLM
A01	4615998	4.7008e-07	BLUP	GLM
A01	4616226	4.7008e-07	BLUP	GLM
A01	4648139	4.8886e-07	BLUP	GLM
A01	4650700	4.8886e-07	BLUP	GLM
A01	4778213	4.8964e-07	BLUP	GLM
A01	4781765	5.0403e-07	BLUP	GLM
A01	4654693	5.3172e-07	BLUP	GLM
A01	4498113	5.4591e-07	BLUP	GLM
A01	4498158	5.4591e-07	BLUP	GLM
A01	4498164	5.4591e-07	BLUP	GLM
A01	4683552	5.4591e-07	BLUP	GLM
A01	4683749	5.4591e-07	BLUP	GLM
A01	4683754	5.4591e-07	BLUP	GLM
A01	4684207	5.4591e-07	BLUP	GLM
A01	4685193	5.4591e-07	BLUP	GLM
A01	4686060	5.4591e-07	BLUP	GLM
A01	4498194	5.4641e-07	BLUP	GLM
A01	4609242	5.6884e-07	BLUP	GLM
A01	4684702	5.8767e-07	BLUP	GLM
A01	4684705	5.8767e-07	BLUP	GLM
A01	4684730	5.8767e-07	BLUP	GLM
A01	4684734	5.8767e-07	BLUP	GLM
A01	4054112	5.9214e-07	BLUP	GLM
A01	4685550	6.2446e-07	BLUP	GLM
A01	4685556	6.2446e-07	BLUP	GLM
A01	4684796	6.3283e-07	BLUP	GLM
A01	4672820	6.5751e-07	BLUP	GLM
A01	4670911	7.1588e-07	BLUP	GLM
A01	4649692	7.7073e-07	BLUP	GLM
A01	4650790	8.2364e-07	BLUP	GLM
A01	4685119	8.288e-07	BLUP	GLM
A01	4671306	9.7412e-07	BLUP	GLM
A01	4682346	9.9635e-07	BLUP	GLM
A01	4673174	1.1028e-06	BLUP	GLM
A01	4673843	1.1028e-06	BLUP	GLM
A01	4674050	1.1028e-06	BLUP	GLM
A01	4674002	1.5814e-06	BLUP	GLM
A01	4787941	1.6138e-06	BLUP	GLM
A01	4778943	1.8514e-06	BLUP	GLM
A01	4685058	1.9709e-06	BLUP	GLM
A01	4046540	2.175e-06	BLUP	GLM
A01	4675472	2.2111e-06	BLUP	GLM
A01	4440896	2.2135e-06	BLUP	GLM
A01	4783233	2.3336e-06	BLUP	GLM
A01	4791160	2.3393e-06	BLUP	GLM
A01	4422428	2.4657e-06	BLUP	GLM
A01	4422840	2.4657e-06	BLUP	GLM
A01	4431984	2.4657e-06	BLUP	GLM
A01	4434264	2.4657e-06	BLUP	GLM
A01	4434556	2.4657e-06	BLUP	GLM
A01	4436377	2.4657e-06	BLUP	GLM
A01	4436440	2.4657e-06	BLUP	GLM
A01	4436464	2.4657e-06	BLUP	GLM
A01	4436482	2.4657e-06	BLUP	GLM
A01	4437402	2.4657e-06	BLUP	GLM
A01	4437424	2.4657e-06	BLUP	GLM
A01	4437447	2.4657e-06	BLUP	GLM
A01	4437479	2.4657e-06	BLUP	GLM
A01	4437547	2.4657e-06	BLUP	GLM
A01	4437600	2.4657e-06	BLUP	GLM
A01	4440562	2.4657e-06	BLUP	GLM
A01	4440579	2.4657e-06	BLUP	GLM
A01	4440846	2.4657e-06	BLUP	GLM
A01	4440878	2.4657e-06	BLUP	GLM
A01	4443421	2.4657e-06	BLUP	GLM
A01	4444421	2.4657e-06	BLUP	GLM
A01	4444576	2.4657e-06	BLUP	GLM
A01	4444673	2.4657e-06	BLUP	GLM
A01	4447352	2.4657e-06	BLUP	GLM
A01	4447430	2.4657e-06	BLUP	GLM
A01	4448134	2.4657e-06	BLUP	GLM
A01	4448572	2.4657e-06	BLUP	GLM
A01	4448794	2.4657e-06	BLUP	GLM
A01	4487079	2.5518e-06	BLUP	GLM
A01	4487081	2.5518e-06	BLUP	GLM
A01	4487155	2.5518e-06	BLUP	GLM
A01	4682768	2.7288e-06	BLUP	GLM
A01	4682788	2.7288e-06	BLUP	GLM
A01	4457163	2.7388e-06	BLUP	GLM
A01	4458875	2.7388e-06	BLUP	GLM
A01	4458916	2.7388e-06	BLUP	GLM
A01	4673441	2.7391e-06	BLUP	GLM
A01	4688060	2.7424e-06	BLUP	GLM
A01	4649616	2.7643e-06	BLUP	GLM
A01	4657268	2.8641e-06	BLUP	GLM
A01	4051955	2.8687e-06	BLUP	GLM
A01	3353019	2.8743e-06	BLUP	GLM
A01	4648111	3.0752e-06	BLUP	GLM
A01	4684986	3.078e-06	BLUP	GLM
A01	4676556	3.097e-06	BLUP	GLM
A01	4686731	3.2129e-06	BLUP	GLM
A01	4682849	3.2365e-06	BLUP	GLM
A01	4682850	3.2365e-06	BLUP	GLM
A01	4682407	3.3195e-06	BLUP	GLM
A01	4682434	3.3195e-06	BLUP	GLM
A01	4682435	3.3195e-06	BLUP	GLM
A01	4682460	3.3195e-06	BLUP	GLM
A01	4682473	3.3195e-06	BLUP	GLM
A01	4682474	3.3195e-06	BLUP	GLM
A01	4046709	3.3797e-06	BLUP	GLM
A01	4047384	3.5317e-06	BLUP	GLM
A01	4047395	3.5317e-06	BLUP	GLM
A01	4053464	3.5836e-06	BLUP	GLM
A01	4686744	3.6548e-06	BLUP	GLM
A01	4640750	3.9579e-06	BLUP	GLM
A01	6100699	4.1399e-06	BLUP	GLM
A01	6100726	4.1399e-06	BLUP	GLM
A01	4435907	4.2483e-06	BLUP	GLM
A01	4435926	4.2483e-06	BLUP	GLM
A01	4436038	4.2483e-06	BLUP	GLM
A01	4436046	4.2483e-06	BLUP	GLM
A01	4046822	4.4294e-06	BLUP	GLM
A01	4046876	4.4294e-06	BLUP	GLM
A01	4399057	4.5959e-06	BLUP	GLM
A01	4399386	4.5959e-06	BLUP	GLM
A01	4400850	4.5959e-06	BLUP	GLM
A01	4403036	4.5959e-06	BLUP	GLM
A01	4404400	4.5959e-06	BLUP	GLM
A01	4404478	4.5959e-06	BLUP	GLM
A01	4404507	4.5959e-06	BLUP	GLM
A01	4404568	4.5959e-06	BLUP	GLM
A01	4405069	4.5959e-06	BLUP	GLM
A01	4405188	4.5959e-06	BLUP	GLM
A01	4405219	4.5959e-06	BLUP	GLM
A01	4405238	4.5959e-06	BLUP	GLM
A01	4407686	4.5959e-06	BLUP	GLM
A01	4407987	4.5959e-06	BLUP	GLM
A01	4408358	4.5959e-06	BLUP	GLM
A01	4408397	4.5959e-06	BLUP	GLM
A01	4408665	4.5959e-06	BLUP	GLM
A01	4408700	4.5959e-06	BLUP	GLM
A01	4408764	4.5959e-06	BLUP	GLM
A01	4409361	4.5959e-06	BLUP	GLM
A01	4409419	4.5959e-06	BLUP	GLM
A01	4409923	4.5959e-06	BLUP	GLM
A01	4410160	4.5959e-06	BLUP	GLM
A01	4412943	4.5959e-06	BLUP	GLM
A01	4412968	4.5959e-06	BLUP	GLM
A01	4413157	4.5959e-06	BLUP	GLM
A01	4413271	4.5959e-06	BLUP	GLM
A01	4413272	4.5959e-06	BLUP	GLM
A01	4414368	4.5959e-06	BLUP	GLM
A01	4414485	4.5959e-06	BLUP	GLM
A01	4414610	4.5959e-06	BLUP	GLM
A01	4414613	4.5959e-06	BLUP	GLM
A01	4417152	4.5959e-06	BLUP	GLM
A01	4418354	4.5959e-06	BLUP	GLM
A01	4418355	4.5959e-06	BLUP	GLM
A01	4421595	4.5959e-06	BLUP	GLM
A01	4046772	5.1731e-06	BLUP	GLM
A01	4046784	5.1731e-06	BLUP	GLM
A01	4047023	5.2778e-06	BLUP	GLM
A01	4054666	5.4546e-06	BLUP	GLM
A01	4046978	5.4606e-06	BLUP	GLM
A01	4421959	5.8869e-06	BLUP	GLM
A01	18704439	6.4826e-06	BLUP	GLM
A01	4777810	6.7558e-06	BLUP	GLM
A01	4440214	7.0902e-06	BLUP	GLM
A01	4440246	7.0902e-06	BLUP	GLM
A01	4440303	7.0902e-06	BLUP	GLM
A01	4440365	7.0902e-06	BLUP	GLM
A01	4440455	7.0902e-06	BLUP	GLM
A01	4440457	7.0902e-06	BLUP	GLM
A01	4452963	7.0902e-06	BLUP	GLM
A01	4793010	7.3776e-06	BLUP	GLM
A01	6333956	7.6091e-06	BLUP	GLM
A01	4656978	7.9906e-06	BLUP	GLM
A01	4668432	8.8068e-06	BLUP	GLM
A01	6334578	9.1191e-06	BLUP	GLM
A01	5038884	9.9208e-06	BLUP	GLM
A01	5038936	9.9208e-06	BLUP	GLM

## Sheet: Supplementary Table 4
Supplementary Table 4. The primers used in this study.
Gene ID	F-primer (5'-3')	R-primer (5'-3')	Application
BnaA06g28290D	AAAATGGCATCAGTGAGCATAC	TGCTATTACCATCAACCACAGT	qRT-PCR
BnaC07g28590D	CGTCTTCTCCATCTTTCTCGAT	AACAGAGAACGTAGGAGACAAG	qRT-PCR
BnaA05g31460D	CGACATAAAGCCTCAGAACTTG	AAATGTTTGGCTCTCCTTTCAC	qRT-PCR
BnaC03g34380D	TAGCTCTGTTGATTGAGTACCC	TCAACATCAGCAGTAACGTTTC	qRT-PCR
BnaA03g04990D	TTGCTTTTTCTCAACGACAGAG	GACTCCTACTCCTCCATGAATG	qRT-PCR
BnaC03g06580D	CCTCGCTGTCTAAGTGACTAAA	CAAGGCAAAGACCGTTACATAC	qRT-PCR
BnaA01g09530D	CACAGTTAGAAGTTTTGCCTCC	AACTGAATAGCTTTTCTTGCGG	qRT-PCR
BnaC03g62810D	CCATTACTCAGAGGCAGAAGAA	AAGCTGTCTTTGACCATCAAAC	qRT-PCR
BnaC04g41660D	TATGTCTGCTGCTGTGATAGAG	TGCAAGACCTTCTTAATGGCTA	qRT-PCR
BnaCnng52760D	GGTTGTTGGACAAGGATCATTC	CGGTCTTGCAAAACCTTCTTAA	qRT-PCR
BnaA03g27010D	GAACTACTTGCATCGTGTTGTT	CGAGTAAAAGCTCTGCCATAAC	qRT-PCR
BnaA09g51790D	TATGTACTGCTGGTGATGATCC	TCGTCTCTGATCATTACTTCCG	qRT-PCR
BnaA06g05770D	ACATACGCATCAGCTGAAAATC	ATCAATTGCAGGTGTGTATTCG	qRT-PCR
BnaC05g07320D	CGTTTTCCTTGCCTTGAAATTG	CGTTTGAAGCCATGTTATTTGC	qRT-PCR
BnaA01.BIN2	CACAGTTAGAAGTTTTGCCTCC	AACTGAATAGCTTTTCTTGCGG	qRT-PCR
BnActin	CTGGAATTGCTGACCGTATGAG	ATCTGTTGGAAAGTGCTGAGGG	qRT-PCR
BnaA01.BIN2	ATGCCGGCTGCTGTAGTTGA	AGTTCCAGACTGATTCAAGA	Subcellular localization
